# Supplementary material for: AMDE-1 Is a Dual Function Chemical for Autophagy Activation and Inhibition
Source: PubMed Central journal article supplement (PMC4403922; doi:10.1371/journal.pone.0122083), 2015-04-20
Supplement: pone.0122083.s002.pdf [file pone.0122083.s002.pdf]

**S1 Table. The fifty-six top hits from the high content screening for chemical modulators of GFP-LC3 punctation**

| PubChem<br>SID | Compound<br>ID     | Well<br>Ref | Average<br>EC50<br>(microM) | SD   | Cluster            | Molecular<br>Weight | Parent<br>Atom<br>Count | Hydrogen<br>Bond<br>Donors | Hydrogen<br>Bond<br>Acceptors | Lipinsk<br>i Score | Polar<br>Surface<br>Area | ALogP | Rotatable<br>Bonds |
|----------------|--------------------|-------------|-----------------------------|------|--------------------|---------------------|-------------------------|----------------------------|-------------------------------|--------------------|--------------------------|-------|--------------------|
| 7975488        | UPDDI-<br>00086635 | H1          | 0.66                        | 0.21 | Cluster 1 14736275 | 335.4               | 23                      | 1                          | 4                             | 0                  | 81.7                     | 2.59  | 6                  |
| 14727439       | UPDDI-<br>00182069 | D2          | 0.98                        | 0.14 | Cluster 1 14736275 | 439.9               | 30                      | 0                          | 5                             | 0                  | 81.62                    | 4.92  | 3                  |
| 14736275       | UPDDI-<br>00164549 | B2          | 0.76                        | 0.39 | Cluster 1 14736275 | 409.5               | 29                      | 1                          | 4                             | 0                  | 85.61                    | 4.91  | 5                  |
| 14745130       | UPDDI-<br>00160901 | I1          | 0.8                         | 0.41 | Cluster 2 17408254 | 280.3               | 21                      | 1                          | 2                             | 0                  | 49.41                    | 2.9   | 2                  |
| 17408254       | UPPDI-<br>00417904 | B3          | 5.29                        | 0.3  | Cluster 2 17408254 | 373.4               | 26                      | 3                          | 3                             | 0                  | 96.53                    | 2.91  | 6                  |
| 17387264       | UPDDI-<br>00172772 | M2          | 3.39                        | 1.97 | Cluster 3 17507614 | 352.4               | 25                      | 1                          | 3                             | 0                  | 68.29                    | 4.61  | 7                  |
| 17507614       | UPDDI-<br>00273769 | J3          | 5.08                        | 3.1  | Cluster 3 17507614 | 420.5               | 28                      | 2                          | 4                             | 0                  | 93.73                    | 3.54  | 11                 |
| 14724612       | UPPDI-<br>00432845 | C2          | 0.46                        | 0.2  | Cluster 4 14741431 | 359.2               | 22                      | 2                          | 2                             | 0                  | 70.14                    | 3.05  | 5                  |
| 14733973       | UPPDI-<br>00442806 | H2          | 0.23                        | 0.11 | Cluster 4 14741431 | 359.2               | 22                      | 2                          | 2                             | 0                  | 70.14                    | 3.05  | 5                  |
| 14741431       | UPPDI-<br>00437670 | G2          | 0.95                        | 0.39 | Cluster 4 14741431 | 294.4               | 22                      | 2                          | 2                             | 0                  | 70.14                    | 2.72  | 5                  |
| 17386500       | UPPDI-<br>00402676 | F2          | 0.63                        | 0.33 | Cluster 4 14741431 | 382.4               | 29                      | 1                          | 4                             | 0                  | 80.38                    | 4.71  | 6                  |
| 4260391        | UPPDI-<br>00423207 | J1          | 1.53                        | 0.69 | Cluster 5 4262411  | 289.3               | 20                      | 1                          | 3                             | 0                  | 59.16                    | 3.08  | 3                  |
| 4262411        | UPPDI-<br>00433011 | K1          | 0.4                         | 0.25 | Cluster 5 4262411  | 283.3               | 21                      | 1                          | 3                             | 0                  | 59.16                    | 3.02  | 3                  |
| 7967417        | UPPDI-<br>00417347 | D3          | 4.86                        | 1.62 | Cluster 5 4262411  | 371.4               | 27                      | 1                          | 5                             | 0                  | 77.62                    | 3.82  | 6                  |
| 14737096       | UPPDI-<br>00438402 | C1          | 0.41                        | 0.27 | Cluster 5 4262411  | 317.4               | 22                      | 1                          | 3                             | 0                  | 59.16                    | 3.86  | 5                  |
| 24786176       | UPPDI-<br>00442790 | F4          | 1.59                        | 1.11 | Cluster 5 4262411  | 347.4               | 24                      | 1                          | 4                             | 0                  | 68.39                    | 3.49  | 7                  |
| 4246481        | UPDDI-<br>00046818 | I3          | 2.84                        | 0.23 | Cluster 6 4254597  | 406.4               | 30                      | 2                          | 4                             | 0                  | 121.1                    | 3.49  | 9                  |
| 4254597        | UPDDI-<br>00026363 | M1          | 0.1                         | 0.08 | Cluster 6 4254597  | 392.4               | 29                      | 2                          | 4                             | 0                  | 138.2                    | 2.09  | 7                  |
| 865858         | UPDDI-<br>00235089 | O2          | 2.87                        | 0.18 | Cluster 7 7975000  | 479.6               | 36                      | 1                          | 4                             | 1                  | 69.99                    | 5.1   | 7                  |
| 7975000        | UPDDI-<br>00074596 | L3          | 4.36                        | 0.91 | Cluster 7 7975000  | 446.5               | 34                      | 1                          | 3                             | 1                  | 70.66                    | 6.56  | 6                  |

|          |                |    |      |      |                    |       |    |   |   |   |       |      |   |
|----------|----------------|----|------|------|--------------------|-------|----|---|---|---|-------|------|---|
| 24792287 | UPDDI-00312614 | A4 | 3.07 | 2.73 | Cluster 8 24805246 | 391.2 | 24 | 0 | 4 | 0 | 81.35 | 3.42 | 4 |
| 24805246 | UPDDI-00309295 | N3 | 2.24 | 1.08 | Cluster 8 24805246 | 346.8 | 24 | 0 | 4 | 0 | 81.35 | 3.32 | 4 |
| 24808048 | UPDDI-00300765 | O3 | 3.76 | 1.75 | Cluster 9 24808160 | 295.3 | 22 | 0 | 3 | 0 | 46.61 | 2.91 | 4 |
| 24808160 | UPDDI-00302197 | C4 | 4.68 | 1.16 | Cluster 9 24808160 | 295.3 | 22 | 0 | 3 | 0 | 46.61 | 2.91 | 4 |
| 844574   | UPDDI-00038031 | F3 | 3.34 | 1.18 | Singletons         | 371.4 | 26 | 1 | 2 | 0 | 86.48 | 3.55 | 6 |
| 855810   | UPPDI-00431229 | K3 | 2.86 | 0.33 | Singletons         | 280.4 | 20 | 2 | 3 | 0 | 66.76 | 1.96 | 0 |
| 856344   | UPPDI-00423347 | A1 | 0.42 | 0.09 | Singletons         | 353.4 | 26 | 2 | 4 | 0 | 112.8 | 2.51 | 5 |
| 856923   | UPDDI-00093356 | G3 | 0.59 | 0.24 | Singletons         | 376.4 | 26 | 1 | 5 | 0 | 84.94 | 2.63 | 6 |
| 3715743  | UPPDI-00442368 | E3 | 3.66 | 1.56 | Singletons         | 374.9 | 26 | 1 | 3 | 0 | 50.8  | 3.89 | 6 |
| 4242320  | UPPDI-00441807 | A2 | 2.84 | 1.08 | Singletons         | 388.4 | 28 | 1 | 5 | 0 | 78.38 | 2.66 | 8 |
| 4246416  | UPDDI-00241543 | J2 | 4.86 | 0.43 | Singletons         | 320.3 | 24 | 0 | 4 | 0 | 52.83 | 2.85 | 3 |
| 4248717  | UPPDI-00441806 | L1 | 2.21 | 0.88 | Singletons         | 386.8 | 26 | 2 | 3 | 0 | 64.88 | 3.11 | 2 |
| 7968184  | UPDDI-00249910 | H3 | 3.67 | 2.49 | Singletons         | 415.2 | 26 | 1 | 4 | 0 | 73.06 | 4    | 3 |
| 14722047 | UPDDI-00178695 | B1 | 1.5  | 0.3  | Singletons         | 378.5 | 28 | 2 | 4 | 0 | 70.25 | 4.6  | 5 |
| 14723293 | UPDDI-00165759 | N1 | 0.82 | 0.4  | Singletons         | 341.5 | 24 | 0 | 2 | 0 | 37.38 | 4.69 | 2 |
| 14726587 | UPDDI-00169864 | A3 | 3.67 | 0.94 | Singletons         | 418.5 | 30 | 2 | 2 | 0 | 101.8 | 3.6  | 8 |
| 14729169 | UPDDI-00164382 | E1 | 0.08 | 0.04 | Singletons         | 446.3 | 28 | 0 | 5 | 0 | 109.5 | 3.45 | 6 |
| 14730495 | UPPDI-00402826 | G1 | 1.62 | 0.41 | Singletons         | 415.7 | 28 | 0 | 3 | 1 | 49.57 | 5.98 | 5 |
| 14731704 | UPPDI-00420366 | P2 | 3.77 | 1.39 | Singletons         | 349.4 | 26 | 1 | 5 | 0 | 94.02 | 4.15 | 5 |
| 14733320 | UPPDI-00434762 | L2 | 5.6  | 1.27 | Singletons         | 392.4 | 27 | 0 | 1 | 0 | 23.55 | 4.75 | 3 |
| 14737900 | UPDDI-00166878 | P1 | 0.31 | 0.28 | Singletons         | 354.5 | 25 | 1 | 3 | 0 | 50.69 | 4.45 | 7 |
| 14741249 | UPDDI-00225071 | E2 | 0.43 | 0.19 | Singletons         | 474.6 | 32 | 1 | 5 | 0 | 74.24 | 3.72 | 9 |
| 14741499 | UPDDI-00225330 | O1 | 2.43 | 1.23 | Singletons         | 316.4 | 24 | 0 | 2 | 0 | 43.6  | 4.84 | 5 |

|          |                    |    |      |      |            |       |    |   |   |   |       |      |    |
|----------|--------------------|----|------|------|------------|-------|----|---|---|---|-------|------|----|
| 14742376 | UPPDI-<br>00424732 | D1 | 0.7  | 0.17 | Singletons | 370.5 | 27 | 1 | 2 | 0 | 76.84 | 4.95 | 4  |
| 14744172 | UPPDI-<br>00437212 | K2 | 4.77 | 3.46 | Singletons | 380.3 | 25 | 1 | 2 | 0 | 32.7  | 4.56 | 7  |
| 14746058 | UPDDI-<br>00160238 | F1 | 1.8  | 0.74 | Singletons | 247.3 | 18 | 2 | 4 | 0 | 76.24 | 2.31 | 6  |
| 17403673 | UPPDI-<br>00433648 | C3 | 1.27 | 0    | Singletons | 380.4 | 29 | 1 | 3 | 1 | 50.69 | 5.04 | 7  |
| 17408907 | UPDDI-<br>00223742 | I2 | 5.55 | 0.2  | Singletons | 364.8 | 25 | 0 | 3 | 1 | 53.75 | 5.25 | 6  |
| 17409719 | UPDDI-<br>00221798 | N2 | 3.23 | 0.71 | Singletons | 371.3 | 24 | 0 | 2 | 1 | 36.68 | 6.33 | 4  |
| 17507447 | UPDDI-<br>00273503 | M3 | 2.62 | 0.11 | Singletons | 219.3 | 15 | 0 | 2 | 0 | 29.54 | 2.27 | 2  |
| 24782220 | UPPDI-<br>00442793 | G4 | 0.27 | 0.09 | Singletons | 335.4 | 25 | 1 | 4 | 0 | 58.89 | 4.75 | 4  |
| 24791273 | UPPDI-<br>00442779 | E4 | 2.29 | 0.31 | Singletons | 249.3 | 18 | 3 | 3 | 0 | 100.2 | 0.85 | 5  |
| 24791537 | UPDDI-<br>00299547 | B4 | 5.27 | 0.33 | Singletons | 330.2 | 24 | 1 | 8 | 1 | 188.6 | 2.82 | 3  |
| 24807884 | UPPDI-<br>00442787 | H4 | 5.53 | 1.38 | Singletons | 446.5 | 33 | 3 | 6 | 0 | 116.7 | 3.25 | 8  |
| 24813857 | UPDDI-<br>00314756 | D4 | 6.11 | 1.26 | Singletons | 472.6 | 35 | 1 | 3 | 0 | 57.58 | 3.97 | 10 |
| 24826599 | UPDDI-<br>00315071 | P3 | 5.72 | 0.52 | Singletons | 277.7 | 19 | 0 | 3 | 0 | 31.23 | 3.52 | 4  |

The top hits from the high content screening assay were sorted first based on clusters and then based on the SID number. Listed here are also the compound ID of the University of Pittsburgh Drug Discovery Institute (UPDDI) and the well reference number for the confirmation study. The molecular weight and the chemical properties were also listed. SID 855810 (in purple) is brefeldin A. SID 14730495 (in red) is AMDE-1, which is featured in this study.
